# Supplementary material for: Cancer-predicting transcriptomic and epigenetic signatures revealed for ulcerative colitis in patient-derived epithelial organoids
Source: PubMed Central journal article supplement (PMC6033374; doi:10.18632/oncotarget.25617), 2018-06-19
Supplement: oncotarget-09-28717-s001.pdf [file oncotarget-09-28717-s001.pdf]

# Cancer-predicting transcriptomic and epigenetic signatures revealed for ulcerative colitis in patient-derived epithelial organoids

## SUPPLEMENTARY MATERIALS

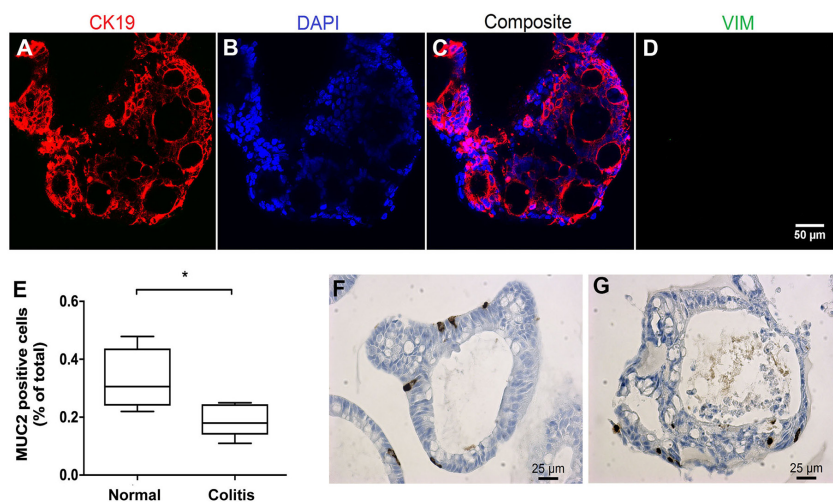

**Supplementary Figure 1: Colitis-derived versus non-IBD organoids.** (A-D) Confocal image confirms the epithelial nature of the organoids and absence of mesenchyme. Immunofluorescence for epithelial marker, CK19 (red, panels A, C) is present, while the mesenchymal marker, VIM (panel D), is absent. DAPI, blue. Scale bar; 50 µm. N > 20. (E) Quantification of MUC2 protein level in colitic versus non-IBD (normal) colon organoid. \*; p < 0.05. (F, G) Immunohistochemistry for chromogranin A. Non-IBD colon organoid versus colitis derived organoid. Staining is equivalent (data not shown), N > 9.

**Disease Ontology (20+ terms)** Global controls

Table controls:  Shown top rows in this table:   Term annotation count: Min:  Max:   Visualize this table:

| Term Name                                 | Binom Rank | Binom Raw p-value | Binom FDR Q-Val | Binom Fold Enrichment | Binom Observed Region Hits | Binom Region Set Coverage | Hyper Rank | Hyper FDR Q-Val | Hyper Fold Enrichment | Hyper Observed Gene Hits | Hyper Total Genes | Hyper Gene Set Coverage |
|-------------------------------------------|------------|-------------------|-----------------|-----------------------|----------------------------|---------------------------|------------|-----------------|-----------------------|--------------------------|-------------------|-------------------------|
| <a href="#">gastrointestinal neoplasm</a> | 2          | 2.8487e-11        | 3.1835e-8       | 2.2385                | 81                         | 9.78%                     | 16         | 3.6398e-4       | 2.0809                | 45                       | 384               | 4.43%                   |
| <a href="#">digestive system cancer</a>   | 4          | 7.0816e-11        | 3.9568e-8       | 2.1958                | 81                         | 9.78%                     | 17         | 4.5210e-4       | 2.0594                | 45                       | 388               | 4.43%                   |

**Supplementary Figure 2: Gene Ontology GREAT Chip-seq analysis.** This figure is extracted from the analysis revealing overall gene expression changes in UC versus non-IBD patient-derived organoids towards a transformed gastrointestinal pathway.

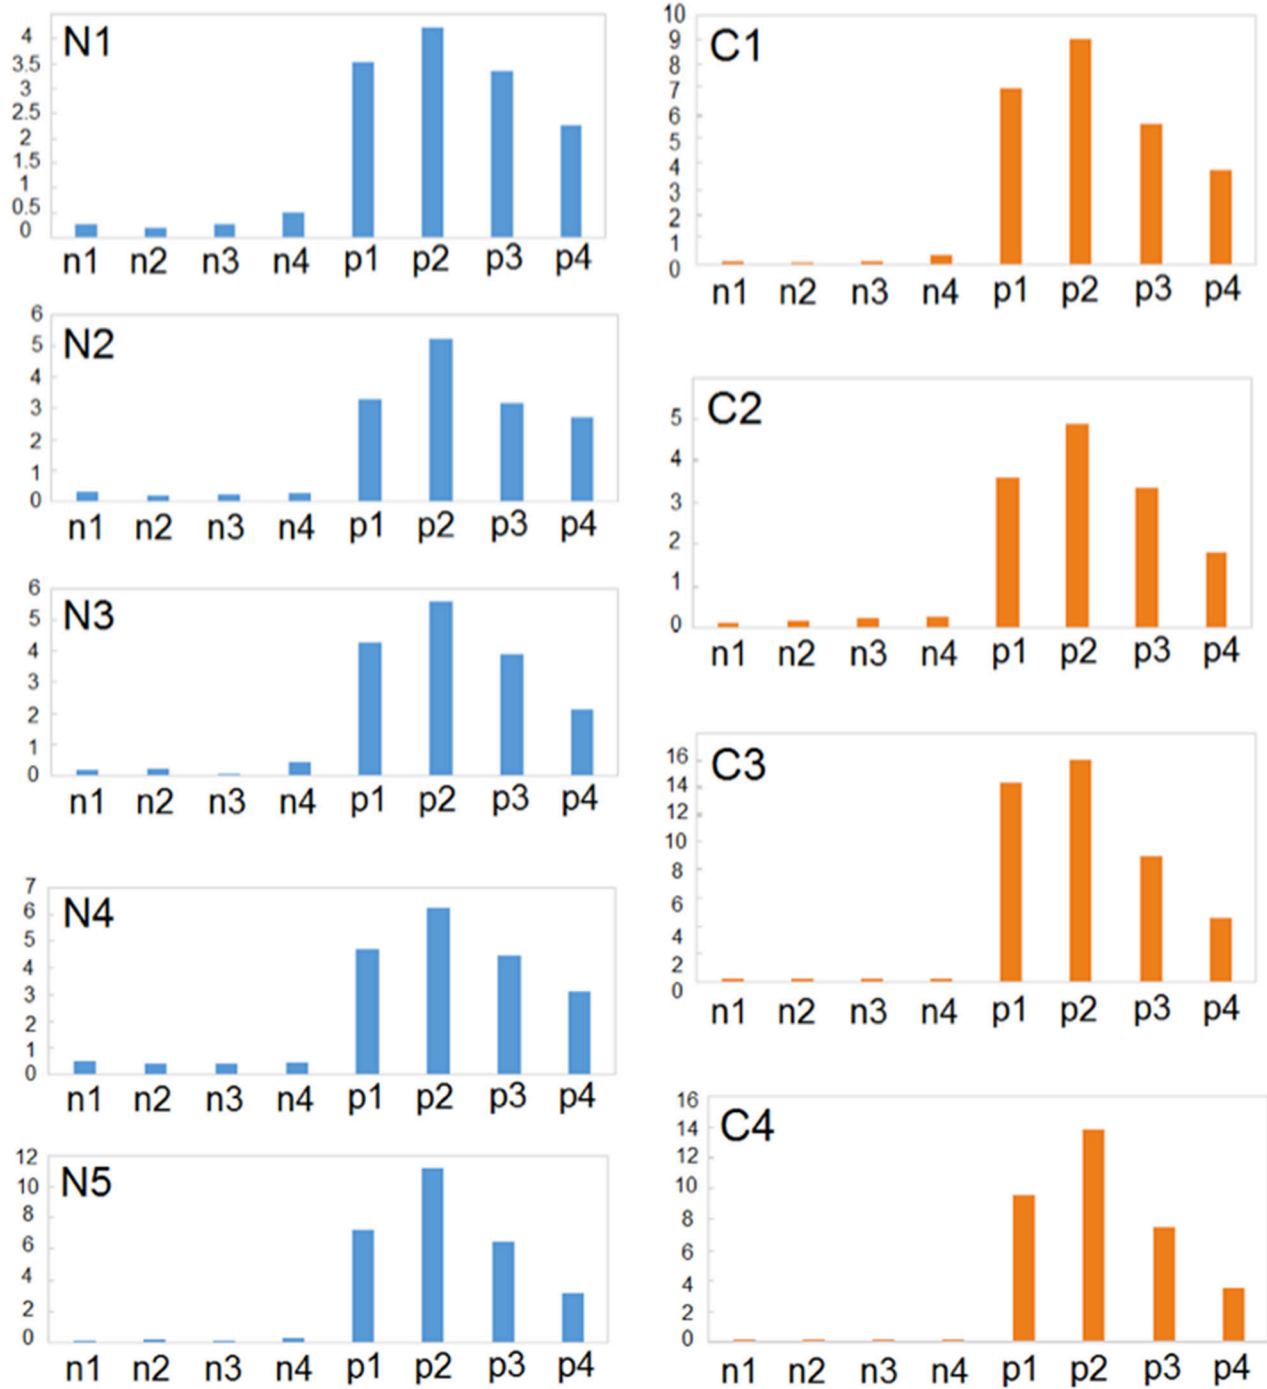

**Supplementary Figure 3: H3K27ac enrichment confirmation.** After enrichment via ChIP for H3K27ac, qRT-PCR demonstrates enrichment for primers within the H3K27ac region (primers p1-p4) with absence of non-specific transcripts (primers n1 – n4). Primer pairs are listed in Supplementary Table 4.

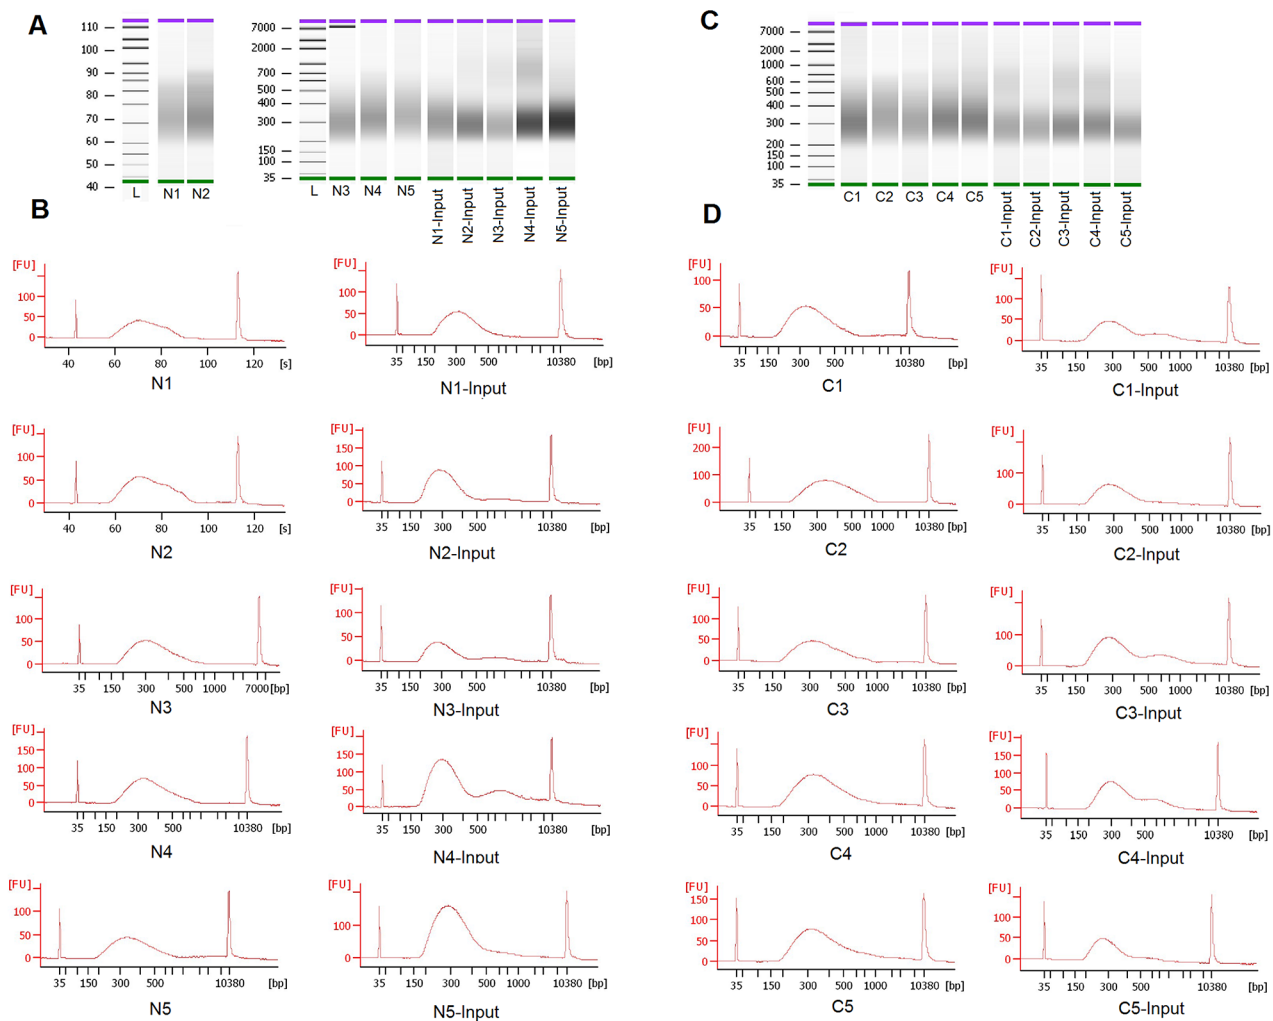

**Supplementary Figure 4: Bioanalyzer results for H3K27ac enriched fragments after library preparation and prior to ChIP-seq analysis.** (A) Bioanalyzer gel demonstrates fragments from non-IBD organoids after chromatin immunoprecipitation (N1–N5) and prior to immunoprecipitation (N1–N5-input). (B) Non-IBD average base pair (bp) size demonstrates the majority of input and post-ChIP output to the preferred range size of 200 – 500 bps. (C) Bioanalyzer gel demonstrates fragments from UC organoids after chromatin immunoprecipitation (C1–C5) and prior to immunoprecipitation (C1–C5-input). (D) UC average base pair (bp) size demonstrates the majority of input and post-ChIP output to the preferred range size of 200 – 500 bps.

**Supplementary Table 1: Patient demographics**

| <b>Patient ID</b> | <b>Indication for Surgery</b> | <b>Pathology (overall)</b>                 | <b>M/F</b> | <b>Race</b> | <b>Disease Duration (Years)</b> | <b>Age at resection</b> |
|-------------------|-------------------------------|--------------------------------------------|------------|-------------|---------------------------------|-------------------------|
| NI 135            | Colon cancer                  | Normal                                     | F          | White       | NA                              | 55                      |
| NI 137            | Colon cancer                  | Normal                                     | M          | White       | NA                              | 65                      |
| NI 141            | Colon cancer                  | Normal                                     | F          | White       | NA                              | 73                      |
| NI 143            | Colon cancer                  | Normal                                     | M          | White       | NA                              | 74                      |
| NI 144            | Colon cancer                  | Normal                                     | F          | White       | NA                              | 66                      |
| NI 145            | Colon cancer                  | Normal                                     | F          | White       | NA                              | 89                      |
| NI 147            | Colon cancer                  | Normal                                     | M          | White       | NA                              | 60                      |
| NI 148            | Colon cancer                  | Normal                                     | M          | White       | NA                              | 76                      |
| NI 149            | Colon cancer                  | Normal                                     | M          | White       | NA                              | 65                      |
| NI 156            | Colon cancer                  | Normal                                     | M          | White       | NA                              | 62                      |
| CTd 111           | Medically refractory colitis  | Low-grade dysplasia                        | M          | White       | 5                               | 60                      |
| CTd 139           | Medically refractory colitis  | Colitis                                    | F          | White       | 3                               | 44                      |
| CTd 140           | Medically refractory colitis  | Colitis with benign strictures             | M          | White       | 36                              | 58                      |
| CTd 142           | Medically refractory colitis  | Chronic active colitis                     | M          | White       | 3                               | 18                      |
| CTd 146           | Medically refractory colitis  | Colitis                                    | F          | White       | 19                              | 58                      |
| CTd 150           | Cancer/Colitis                | T3N1a                                      | F          | White       | 13                              | 44                      |
| CTd 151           | Medically refractory colitis  | Chronic active colitis                     | F          | White       | 3                               | 40                      |
| CTd 152           | Medically refractory colitis  | Colitis with fibrosis and treatment effect | M          | White       | 6                               | 25                      |
| CTd 153           | Medically refractory colitis  | Chronic active colitis                     | M          | White       | 6                               | 24                      |
| CTd 155           | Medically refractory colitis  | Chronic active colitis                     | M          | White       | 5                               | 50                      |

Patient indication for surgery, pathology, gender, ethnicity, disease duration, age at resection.

**Supplementary Table 2: Short-tandem repeat: Analysis of genomic DNA extracted from epithelioids**

| <b>Patient</b> | <b>D13S317</b> | <b>D16S539</b> | <b>CSF1PO</b> | <b>TH01</b> | <b>vWA</b> | <b>D21S11</b> | <b>D7S820</b> | <b>D5S818</b> | <b>TPOX</b> | <b>Amelogenin</b> |
|----------------|----------------|----------------|---------------|-------------|------------|---------------|---------------|---------------|-------------|-------------------|
| NI 135<br>EP   | 10,13          | 12             | 9,12          | 6,7         | 17         | 32.2          | 10,12         | 9,13          | 8,10        | X                 |
| NI 137<br>EP   | 11             | 12,14          | 11,13         | 9.3         | 16,17      | 30,30.2       | 8,10          | 11,12         | 8,9         | X,Y               |
| NI 141<br>EP   | 11,12          | 9,12           | 11            | 9,9.3       | 17,19      | 28,30         | 9,13          | 10,13         | 8,11        | X, Y              |
| NI 143<br>EP   | 11,12          | 11             | 10,12         | 6,9         | 17         | 28,29         | 10            | 11,14         | 8,9         | X,Y               |
| NI 144<br>EP   | 11             | 11,13          | 11,12         | 9.3         | 16,19      | 29,31.2       | 10            | 11            | 6,11        | X                 |
| NI 145<br>EP   | 11             | 8,13           | 10,13         | 6,8         | 17,18      | 27,29         | 10,12         | 12,13         | 8           | X,Y               |
| NI 147<br>EP   | 11,13          | 11,12          | 10,13         | 6,9.3       | 14,17      | 30,30.2       | 8,10          | 12,13         | 9,11        | X,Y               |
| NI 148<br>EP   | 11             | 11,14          | 11,13         | 5,7         | 14,16      | 30,33.2       | 9,10          | 10,11         | 10,11       | X,Y               |
| NI 149<br>EP   | 8,12           | 11,12          | 9,12          | 8,9.3       | 14,15      | 32.2,33.2     | 9,10          | 12            | 8,10        | X,Y               |
| NI 156<br>EP   | 12,13          | 9,11           | 10,12         | 8,9         | 18,20      | 28,32.2       | 8,10          | 13            | 11          | X,Y               |
| CTd 111<br>EP  | 9,12           | 13             | 11,12         | 6,9         | 14,18      | 29,30.2       | 9,12          | 11,12         | 10,11       | X,Y               |
| CTd 139<br>EP  | 12             | 13             | 11,12         | 9           | 17,18      | 30,31.2       | 10,11         | 12,13         | 8,9         | X                 |
| CTd 140<br>EP  | 12             | 11,14          | 12,13         | 7,9         | 15,16      | 32.2          | 10,11         | 9,12          | 8,11        | X,Y               |
| CTd 142<br>EP  | 11,            | 11             | 8,11          | 7,9.3       | 16,17      | 30,33         | 9,11          | 13            | 9,11        | X                 |
| CTd 146<br>EP  | 8,9            | 9              | 10,12         | 7,9         | 15,17      | 28,30         | 8,10          | 12,13         | 8,11        | X                 |
| CTd 150<br>EP  | 11,13          | 12,13          | 10,12         | 9.3         | 14,17      | 29            | 8,9           | 11,12         | 8,11        | X                 |
| CTd 151<br>EP  | 11,12          | 12             | 9,12          | 6,7         | 18         | 27,30         | 10,13         | 10,13         | 8,9         | X                 |
| CTd 152<br>EP  | 11,12          | 9,11           | 10            | 6,9.3       | 17         | 28,30         | 8,12          | 11            | 8,11        | X,Y               |
| CTd 153<br>EP  | 8,9            | 11,12          | 9,12          | 6,9.3       | 14,17      | 31,33.2       | 9,10          | 11            | 9,11        | X,Y               |
| CTd 155<br>EP  | 8              | 12,13          | 11,12         | 7,9.3       | 17         | 30,31.2       | 8,10          | 12,13         | 8,11        | X,Y               |

**Supplementary Table 3: Immunohistochemistry antibodies, vendors, concentrations**

| <b>Antigen</b> | <b>Vendor</b> | <b>Catalog Number</b> | <b>Dilution</b> |
|----------------|---------------|-----------------------|-----------------|
| S100P          | Abcam         | ab133654              | 1/200           |
| PHLDA1         | Abcam         | ab133654              | 1/50            |
| ALDH1A1        | Abcam         | ab52492               | 1/60            |
| Ki67           | Novus         | NB110-89717           | 1/1000          |
| MUC2           | Abcam         | ab7848                | 1/400           |
| Lysozyme       | Dako          | A0099                 | 1/100           |
| Cytokeratin 19 | Abcam         | ab8187                | 1/400           |
| Vimentin       | R&D systems   | MAB2105               | 1/1000          |

**Supplementary Table 4: Gene enrichment confirmatory primers for H3K27ac\***

| <b>Name</b> | <b>Forward primer</b> | <b>Reverse Primer</b> |
|-------------|-----------------------|-----------------------|
| THAP9 - N1  | CCAGCCAGGTTTTTCATCATT | TGCAGCAACATGGATAGAGC  |
| CHD1 - N1   | GGGTGAAGCTGACTCTGAGG  | CAGCCTGGGCAATATAGGAA  |
| CHD1 - N2   | CCCCTCAAGACCACACCTAA  | GTGTGCATCCTCCCAAAACT  |
| CHD1 - P1   | GGTATGGGCGCTAATGTCAC  | GAGTCCCATCGCAGTCTCTC  |
| SOX4 - P1   | AAGCTTCAGCAACCAGCATT  | CCCTCTCTCTCGCTCTCTCA  |
| RFX3 - P1   | CTCTCATCCCCCGTTACTCA  | GGTGTTTGAGATGGCAGGTT  |
| KLF6 - N1   | CAGAGGGGAAGCATGCTAAG  | ACCGGGATTGAAAATTACC   |
| KLF6 - P2   | AGAGGCAGCAGCGATGTATT  | GTGCTCATCAGCGTAATGGA  |

\*In addition to comparison to input DNA, these primers were used to validate specificity of enrichment.

**Supplementary Table 5: Full cohort RNA-seq upregulated and downregulated genes (Represented top 30 upregulated and downregulated genes, comparing colitis to non-IBD colon epithelioids)**

| <b>A. Top 30 upregulated genes full cohort</b> |                  | <b>B. Top 30 downregulated genes full cohort</b> |                  |
|------------------------------------------------|------------------|--------------------------------------------------|------------------|
| <b>Symbol</b>                                  | <b>Log2 (FC)</b> | <b>Symbol</b>                                    | <b>Log2 (FC)</b> |
| SLC28A2                                        | 3.02187          | SYNGAP1                                          | -2.4198          |
| APOL1                                          | 2.47946          | UGT2A3                                           | -1.75048         |
| PPDPF                                          | 2.47631          | RETNLB                                           | -1.5931          |
| AQP3                                           | 2.46268          | PLA2G4C                                          | -1.43669         |
| HOXB13                                         | 2.44272          | ENPP3                                            | -1.41561         |
| ARHGDI1                                        | 2.25761          | RPL9                                             | -1.35255         |
| FBRSL1                                         | 2.21881          | RYR3                                             | -1.13516         |
| PLA2G2A                                        | 2.05797          | C1orf132                                         | -1.10852         |
| HNRNPH3                                        | 2.04738          | C8orf4                                           | -1.0697          |
| HAGHL                                          | 1.98728          | STIM1                                            | -1.04205         |
| PODXL                                          | 1.97956          | TM4SF1                                           | -0.98237         |
| MYD88                                          | 1.96608          | AKR1C3                                           | -0.95896         |
| NRBP2                                          | 1.95469          | AKR1C2                                           | -0.9528          |
| WDR72                                          | 1.94592          | ERO1A                                            | -0.93548         |
| ZYX                                            | 1.93319          | GABRA2                                           | -0.92556         |
| RPLP1                                          | 1.91376          | ZG16                                             | -0.89103         |
| TIMP4                                          | 1.90854          | ARRDC3                                           | -0.84477         |
| UBALD1                                         | 1.90315          | SLC11A2                                          | -0.84332         |
| BCL9L                                          | 1.90288          | GOLT1A                                           | -0.84284         |
| PHLDA2                                         | 1.89078          | TLR4                                             | -0.7723          |
| ATP2A3                                         | 1.87201          | MT-ND6                                           | -0.75765         |
| HSPB1                                          | 1.86269          | FTL                                              | -0.75299         |
| KRT7                                           | 1.85622          | ANXA2                                            | -0.73331         |
| SLC7A7                                         | 1.84861          | P4HA1                                            | -0.73034         |
| CLDN3                                          | 1.83269          | SAT1                                             | -0.72137         |
| MAST3                                          | 1.79142          | VWA5A                                            | -0.70748         |
| ATP6V0C                                        | 1.78948          | ALDH1A1                                          | -0.70505         |
| NFIC                                           | 1.7841           | PTTG1                                            | -0.69391         |
| UBALD2                                         | 1.77664          | NOP10                                            | -0.68687         |
| TTL6                                           | 1.76493          | RPL34                                            | -0.67344         |



**Supplementary Table 6: Top upregulated and downregulated genes subset B**

| <b>A. Top upregulated genes full cohort</b> |                  | <b>B. Top 30 downregulated genes full cohort</b> |                  |
|---------------------------------------------|------------------|--------------------------------------------------|------------------|
| <b>Symbol</b>                               | <b>Log2 (FC)</b> | <b>Symbol</b>                                    | <b>Log2 (FC)</b> |
| NPSR1                                       | 5.00481          | MCOLN2                                           | -3.70327         |
| LYZ                                         | 4.73378          | MTIL                                             | -2.90424         |
| RPS16                                       | 4.50878          | FHL1                                             | -2.58855         |
| FBRSL1                                      | 3.73007          | UGT2A3                                           | -2.34656         |
| PPDPF                                       | 3.61952          | EPB41L3                                          | -2.33001         |
| MSLN                                        | 3.43814          | RDX                                              | -2.21112         |
| FSTL1                                       | 3.2802           | PTPRO                                            | -2.09462         |
| PHLDA2                                      | 3.15846          | SPG20                                            | -2.05226         |
| PER1                                        | 3.1431           | ZDHHC2                                           | -1.93505         |
| SLC28A2                                     | 3.07884          | DRAIC                                            | -1.91033         |
| HSPB1                                       | 2.97515          | NLRP2                                            | -1.83767         |
| ARHGDI A                                    | 2.95629          | PRKAA2                                           | -1.71988         |
| ZYX                                         | 2.94151          | SLC39A2                                          | -1.70247         |
| TACSTD2                                     | 2.85882          | RPL9                                             | -1.69293         |
| CLDN3                                       | 2.8162           | RETNLB                                           | -1.68404         |
| FLNA                                        | 2.76354          | NFATC2IP                                         | -1.61186         |
| SCAND1                                      | 2.73961          | LRP12                                            | -1.59711         |
| HIST2H3D                                    | 2.73145          | B4GALNT2                                         | -1.5582          |
| APOBR                                       | 2.71831          | ZNF43                                            | -1.51893         |
| BCL9L                                       | 2.66525          | GABRA2                                           | -1.45787         |
| LTBP4                                       | 2.6512           | HTR4                                             | -1.45708         |
| ARHGDI B                                    | 2.61455          | URAD                                             | -1.43137         |
| RAVER1                                      | 2.61393          | PHKA2                                            | -1.42137         |
| HOXB13                                      | 2.58295          | NR1H4                                            | -1.41512         |
| ANPEP                                       | 2.58111          | ANO5                                             | -1.39797         |
| SLC9A3R2                                    | 2.55819          | RPS4Y1                                           | -1.30354         |
| LAMA5                                       | 2.55774          | LPAR1                                            | -1.29485         |
| SOD3                                        | 2.54653          | MIPOL1                                           | -1.27782         |
| PYY                                         | 2.539            | DYNC1I1                                          | -1.25938         |
| NFIC                                        | 2.52708          | EEF1A1P11                                        | -1.25274         |
| S100P                                       | 2.33816          |                                                  |                  |

**Supplementary Table 7: Gene enrichment for H3K27ac Colitis versus Non-IBD organoids\***

| <b>Gene Symbol</b> | <b>Log2 (FC)</b> |
|--------------------|------------------|
| TSSC1              | 2.170274         |
| PITX1              | 2.03683          |
| STPG4              | 1.923237         |
| B3GNTL1            | 1.881085         |
| SDHA               | 1.80076          |
| PDX1               | 1.789857         |
| CCL28              | 1.676845         |
| ABCA12             | 1.645783         |
| APOL1              | 1.615867         |
| FAM107B            | 1.57586          |
| SULT1C4            | 1.57056          |
| KPNA1              | 1.55623          |
| AMN1               | 1.555893         |
| MBOAT2             | 1.508358         |
| CADPS2             | 1.504646         |
| RAD51B             | 1.501779         |
| FAM84A             | 1.476736         |
| ZNF302             | 1.467879         |
| BLVRA              | 1.453556         |
| SMCO4              | 1.435216         |
| LYZ                | 1.42346          |
| HIVEP3             | 1.421301         |
| NPSR1              | 1.420808         |
| KCNJ3              | 1.416676         |
| SEMA5A             | 1.408628         |
| TBX15              | 1.4078           |
| HSPBAP1            | 1.40598          |
| SPICE1             | 1.400253         |
| B3GALT5            | 1.391679         |
| CDC42EP3           | 1.383068         |
| WDR75              | 1.380746         |
| SLC17A8            | 1.378241         |
| HIVEP3             | 1.373505         |
| SGMS1              | 1.362404         |
| S100P              | 1.351097         |

\*Represented top 35 upregulated genes comparing colitis to non-IBD.
